# Supplementary material
Source: PubMed Central journal article supplement (PMC6485620)
Supplement: NIHMS77080-supplement-Supplementary_data.pdf [file NIHMS77080-supplement-Supplementary_data.pdf]

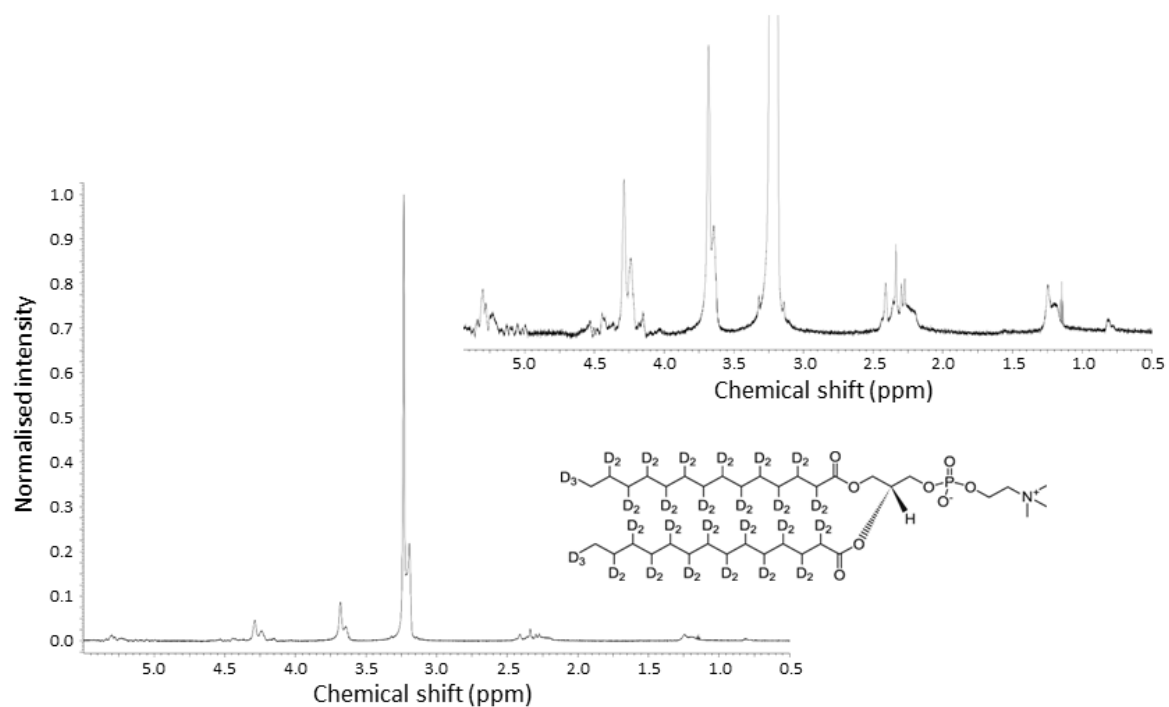

Supplementary Figure 1 – 1D spectrum of 1,2-dimyristoyl-d54-sn-glycero-3-phosphocholine in 50mM sodium phosphate and 200mM NaCl pH 7.5 showing the presence of weak signals at 2.5, 1.3 and 0.8ppm confirming the presence of hydrogenated acyl chain signals within the sample. Inset, zoomed in section of the spectrum showing more clearly the presence of weak signals attributed to hydrogenated acyl chains. Chemical structure of D54-DMPC showing the positions of deuteration within the sample.

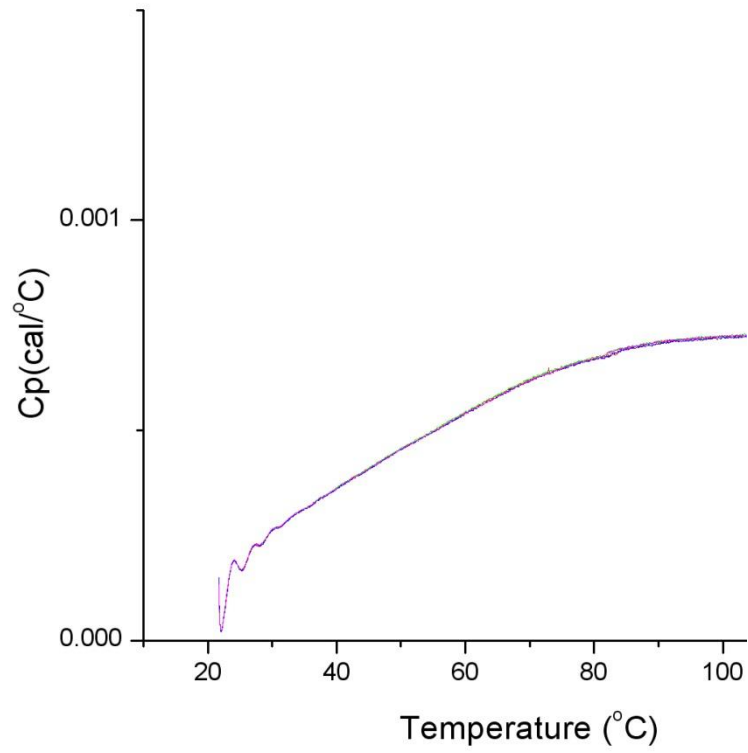

Supplementary Figure 2. Differential Scanning Calorimetry scan of 2.5% w/v SMA polymer in 50 mM TrisHCl pH 8.0, 200 mM NaCl.
